# Supplementary material for: On the electron delocalization in the radical cations formed by oxidation of MM quadruple bonds linked by oxalate and perfluoroterephthalate bridgesElectronic Supplementary Information (ESI) available: experimental procedures; details of instrumentation; electronic absorption spectra of Mo2(O2CtBu)4+ and Mo4OXA+; tabulation of selected Raman data. See http://www.rsc.org/suppdata/cc/b2/b202344j/Dedicated to Prof. Dr Walter Siebert on the occasion of his retirement.
Source: Royal Society of Chemistry journal article supplement (doi:10.1039/b202344j), 2002-04-18
Supplement: b202344j.doc [file b202344j.doc]

**Supplementary Material (ESI) for Chemical Communications**

**This journal is © The Royal Society of Chemistry 2002**

**Experimental Procedures.**

**Physical Techniques.** All spectra were recorded in a dry and oxygen-free THF or 2:1 THF:CH2Cl2 mixtures.

X-band EPR spectra were recorded using a Bruker ESP300 Electron Spin Resonance Spectrometer. Temperature regulation was achieved using a Bruker Variable Temperature Unit.

UV/Vis/NIR spectra were recorded using a PerkinElmer Lambda 900 UV/Vis/NIR spectrometer, with nitrogen purging. A 1.00 mm IR quartz cell was employed. A spectrum of the neat solvent was subtracted.

Raman spectra were recorded using an Action Spectropro 500i monochrometer operating with a 1800 groove/mm grating, following excitation with the 647.1 nm line of a Coherent Innova 301 Kr+ laser. Wavenumber calibration was performed by superimposing the lines from a neon lamp onto the experimental spectrum. A Nikon camera lens (f = 1.4, d = 0.85 mm, diameter = 72 mm) was used as a collection optic, and the Rayleigh scattering was filtered with 2 notch filters appropriate to the laser line. The sample was contained in an NMR tube, with spinning at 20 Hz. Cooling was achieved using an especially-prepared cryostat.

**Synthesis.** All manipulations were performed in a nitrogen-filled glovebox, using dry and oxygen-free distilled solvents.

**Mo4OXA+PF6-.** 6.5 mg (6.0 mol) Mo4OXA was dissolved in 10.0 mL THF.

0.16 mL (1 eq) of a freshly prepared 4.2 mg/mL stock solution of Cp2Fe+PF6- in CH2Cl2 was added by syringe. A dramatic color change from red to blue occured. The resulting solution was stirred for 1 min. The blue coloration of the solution faded to red over the course of 1 h.

**Mo­4PFT+PF6-.** 6.9 mg (5.6 mol) Mo4PFT was dissolved in 10.0 mL THF. 0.47

mL (1 eq) of a freshly prepared 4.0 mg/mL stock solution of Cp2Fe+PF6- in CH2Cl2 was added by syringe, and the resulting red solution was stirred for 1 min.

**W4OXA+PF6-.** 7.8 mg (5.5 mol) W4OXA was dissolved in 10.0 mL THF. 0.46

mL (1 eq) of a freshly prepared 3.9 mg/mL stock solution of Cp2Fe+PF6- in CH2Cl2 was added by syringe, and the resulting blue solution was stirred for 1 min.

**W4PFT+PF6-.** 4.5 mg (2.9 mol) W4PFT was dissolved in 10.0 mL THF. 0.43

mL (1 eq) of a freshly prepared 2.2 mg/mL stock solution of Cp2Fe+PF6- in CH2Cl2 was added by syringe, and the resulting blue solution was stirred for 1 min.

**List of Supplementary Tables.**

**Table S1.** Selected Raman data for Mo4OXA and Mo4­OXA+, as THF solutions. The species were excited with a 647.1 nm laser line at a power of 225 mW.

**List of Supplementary Figures.**

**Figure S1.** UV/Vis/NIR spectra of the Mo4OXA + Cp­2Fe+PF6- reaction mixture, recorded in THF at 10 min intervals. The first spectrum was recorded 15 min after mixture of the reagents. The molar absorptivity scale is calculated with respect to amount of starting material.

**Figure S2.** UV/Vis/NIR spectrum of Mo2(OtBu)4+ in dichloromethane.

Table S1.

| Assignment | Mo4OXA  / cm-1 | Mo4OXA+ v / cm-1 |
| --- | --- | --- |
| 1 | 1384s | 1322s |
| 2 | 909s | 922s, sh |
| 3 | 565m | 578m |
| (MM) | 391m | 393s |

# Figure S1.







**Figure S2.**
